# Supplementary material for: Fecht's acid revisited: a spirocyclic dicarboxylate for non-aromatic MOFs
Source: Royal Society of Chemistry journal article supplement (doi:10.1039/d1ce01542g), 2021-11-22
Supplement: d1ce01542g1.pdf [file d1ce01542g1.pdf]

## **Fecht's acid revisited: a spirocyclic dicarboxylate for non-aromatic MOFs**

Valentyna D. Slyusarchuk and Chris S. Hawes

### **Supporting Information**

|                                  |    |
|----------------------------------|----|
| 1. Additional Structural Figures | 2  |
| 2. Crystallographic Data Tables  | 7  |
| 3. X-ray Powder Diffraction      | 8  |
| 4. Thermogravimetric Analysis    | 9  |
| 5. Gas Adsorption Data           | 10 |
| 6. NMR Spectra                   | 13 |
| 7. References                    | 15 |

## 1. Additional Figures

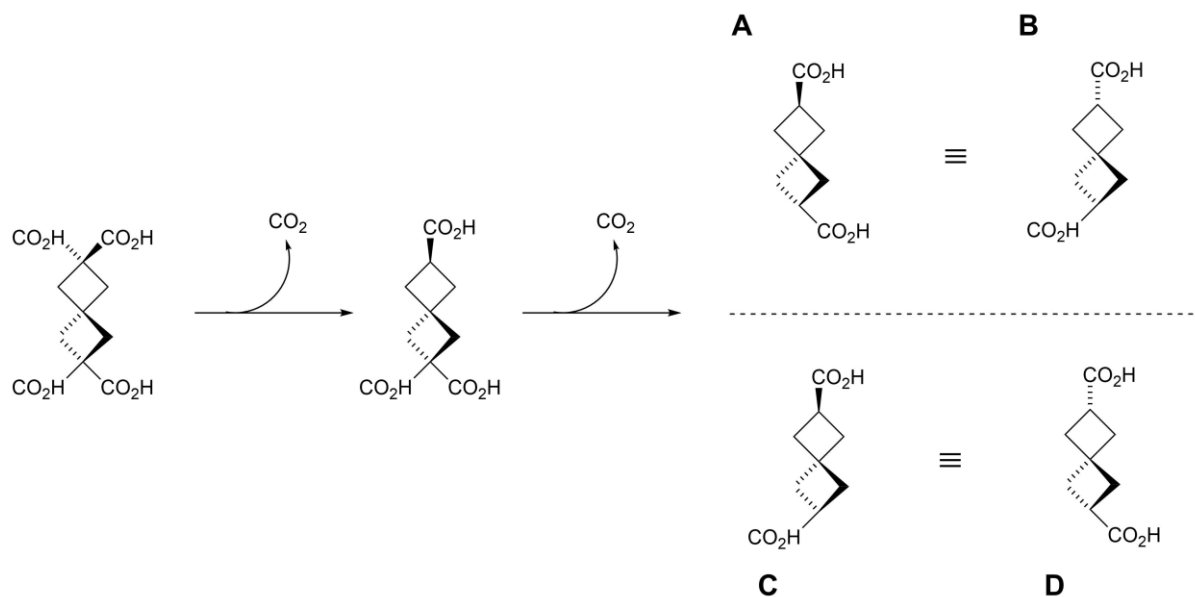

**Figure S1** Description of the double decarboxylation step in the synthesis of **H<sub>2</sub>SHDC** which gives only two enantiomers, shown here as the four possible combinations of decarboxylations from the tetracarboxylate. A/B and C/D are identical, related by rotation. A/D and B/C are enantiomers, visualised by reflection in the plane of the page, and A/C and B/D are enantiomers by reflection perpendicular to the page.

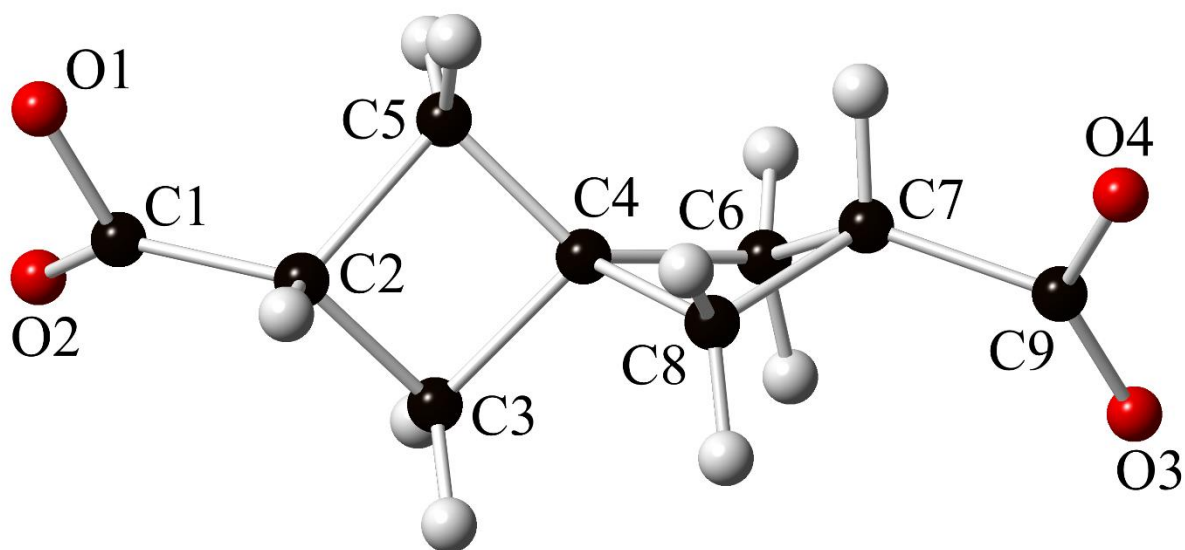

**Figure S2.** Representative structure of **SHDC** with calculated hydrogen atom positions shown

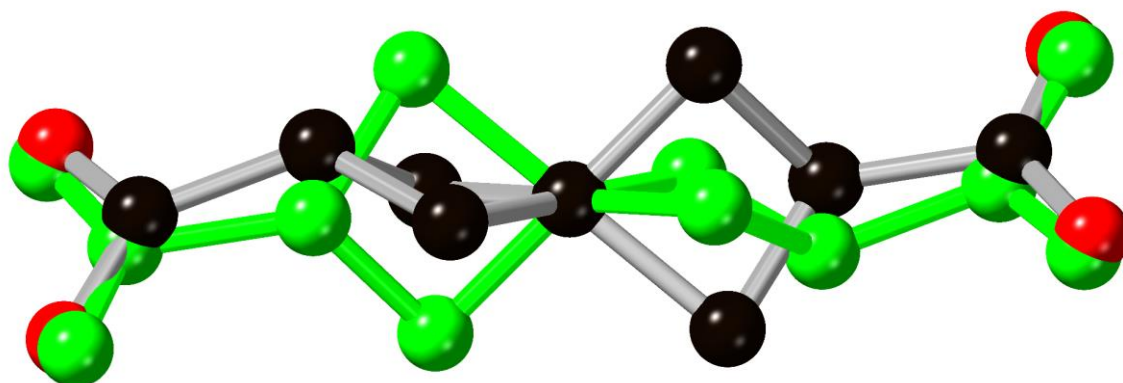

**Figure S3** Typical disorder mode observed for SHDC molecules in complexes **1** and **2**. In this example the spiro carbon atom position is precisely shared between two orientations of the molecule (coloured separately), but for the examples in complex **1** this atom is also split across the symmetry element. Hydrogen atoms are omitted for clarity.

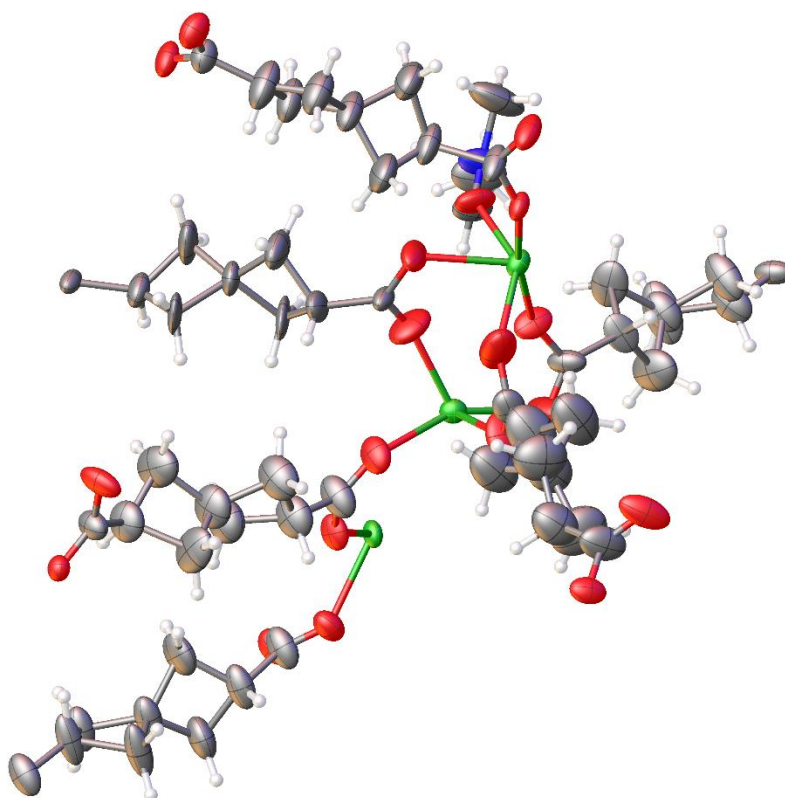

**Figure S4** The asymmetric unit of complex **1**, ADPs are rendered at the 50% probability level. Note that the carbon backbones of the three SHDC residues missing terminal carboxylates from the asymmetric unit are modelled at 50% occupancy and split across inversion centres; the carboxylate (COO) atoms are generated by symmetry.

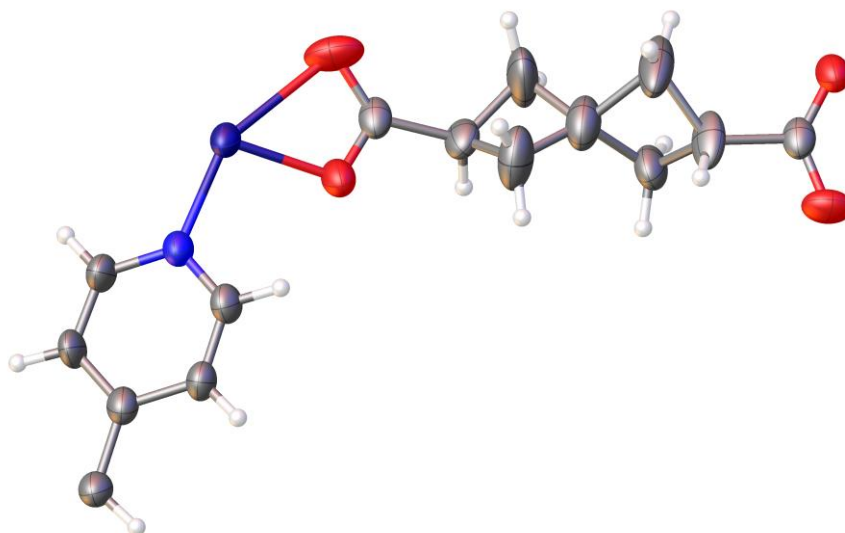

**Figure S5** The asymmetric unit of complex **2**, with ADPs rendered at the 50% probability level. Note that the spiro carbon atom occupies an inversion centre and all remaining atoms of the **SHDC** molecule are modelled at half occupancy, with the second overlapping (Fig. S2) orientation generated by symmetry.

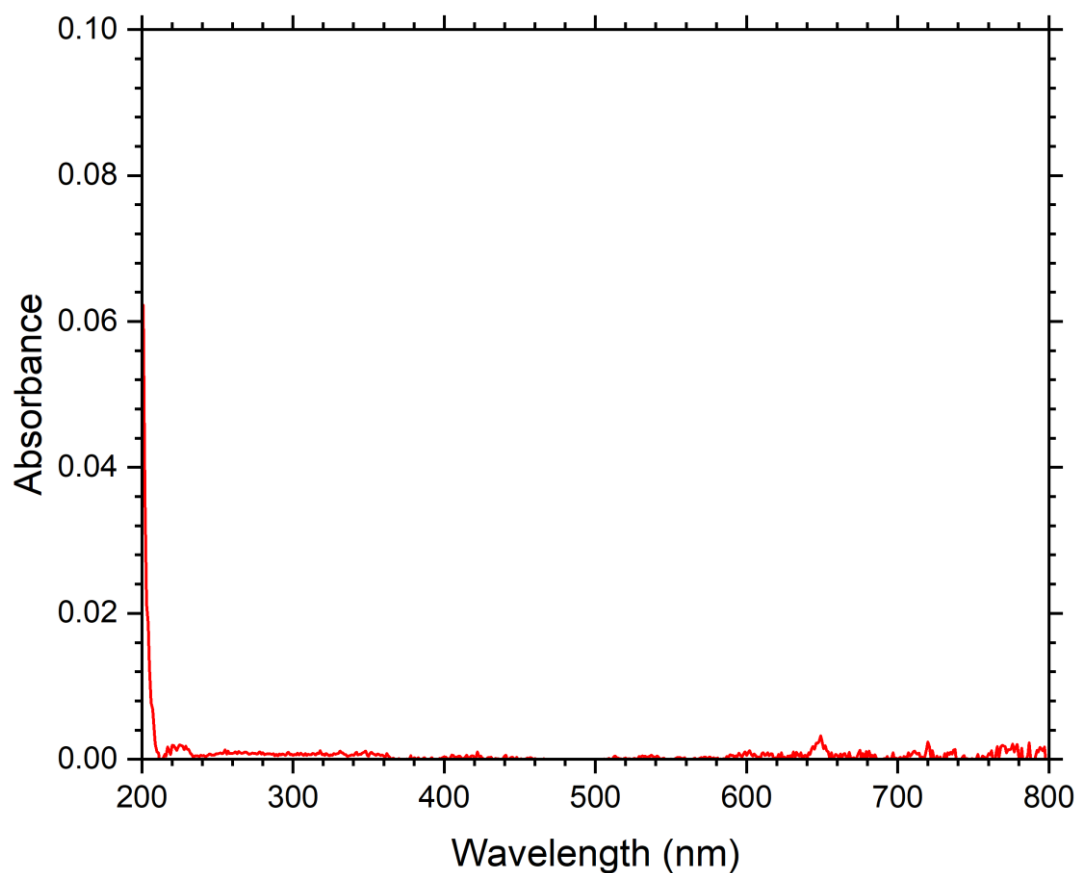

**Figure S6** UV-Visible absorption spectrum of a 40  $\mu\text{M}$  solution of **H<sub>2</sub>SHDC** in methanol showing only baseline noise above 235 nm.

## 2. Crystallographic Data Tables

Table S1. Crystallographic Tables for Complex 1 and Complex 2

| Compound Reference                          | 1                                                                               | 2                                                                |
|---------------------------------------------|---------------------------------------------------------------------------------|------------------------------------------------------------------|
| Empirical formula                           | C <sub>88</sub> H <sub>104</sub> N <sub>2</sub> O <sub>38</sub> Yb <sub>6</sub> | C <sub>21</sub> H <sub>20</sub> N <sub>2</sub> O <sub>4</sub> Zn |
| Formula weight                              | 2835.97                                                                         | 429.76                                                           |
| Temperature/K                               | 150                                                                             | 150                                                              |
| Crystal system                              | monoclinic                                                                      | orthorhombic                                                     |
| Space group                                 | <i>P2<sub>1</sub>/n</i>                                                         | <i>Pnna</i>                                                      |
| a/Å                                         | 12.4079(8)                                                                      | 11.3429(10)                                                      |
| b/Å                                         | 20.8937(14)                                                                     | 12.4311(10)                                                      |
| c/Å                                         | 19.4442(12)                                                                     | 18.5115(14)                                                      |
| α/°                                         | 90                                                                              | 90                                                               |
| β/°                                         | 90.801(2)                                                                       | 90                                                               |
| γ/°                                         | 90                                                                              | 90                                                               |
| Volume/Å <sup>3</sup>                       | 5040.4(6)                                                                       | 2610.2(4)                                                        |
| Z                                           | 2                                                                               | 4                                                                |
| ρ <sub>calc</sub> /cm <sup>3</sup>          | 1.869                                                                           | 1.094                                                            |
| μ/mm <sup>-1</sup>                          | 5.593                                                                           | 0.963                                                            |
| F(000)                                      | 2740                                                                            | 888                                                              |
| Crystal size/mm <sup>3</sup>                | 0.15 × 0.14 × 0.05                                                              | 0.35 × 0.31 × 0.16                                               |
| Radiation                                   | MoKα (λ = 0.71073)                                                              | MoKα (λ = 0.71073)                                               |
| 2θ range for data collection/°              | 4.19 to 53.074                                                                  | 6.556 to 53                                                      |
| Index ranges                                | -13 ≤ h ≤ 15, -26 ≤ k ≤ 26, -24 ≤ l ≤ 22                                        | -12 ≤ h ≤ 14, -15 ≤ k ≤ 15, -23 ≤ l ≤ 23                         |
| Reflections collected                       | 50050                                                                           | 15765                                                            |
| Independent reflections                     | 10423 [R <sub>int</sub> = 0.0868, R <sub>sigma</sub> = 0.0597]                  | 2688 [R <sub>int</sub> = 0.0469, R <sub>sigma</sub> = 0.0297]    |
| Data/restraints/parameters                  | 10423/640/703                                                                   | 2688/81/171                                                      |
| Goodness-of-fit on F <sup>2</sup>           | 1.019                                                                           | 1.054                                                            |
| Final R indexes [I ≥ 2σ (I)]                | R <sub>1</sub> = 0.0599, wR <sub>2</sub> = 0.1446                               | R <sub>1</sub> = 0.0501, wR <sub>2</sub> = 0.1293                |
| Final R indexes [all data]                  | R <sub>1</sub> = 0.0952, wR <sub>2</sub> = 0.1663                               | R <sub>1</sub> = 0.0758, wR <sub>2</sub> = 0.1502                |
| Largest diff. peak/hole / e Å <sup>-3</sup> | 3.51/-1.85                                                                      | 0.33/-0.36                                                       |
| CCDC Number                                 | 2106213                                                                         | 2106214                                                          |

### 3. Powder X-Ray Diffraction Data

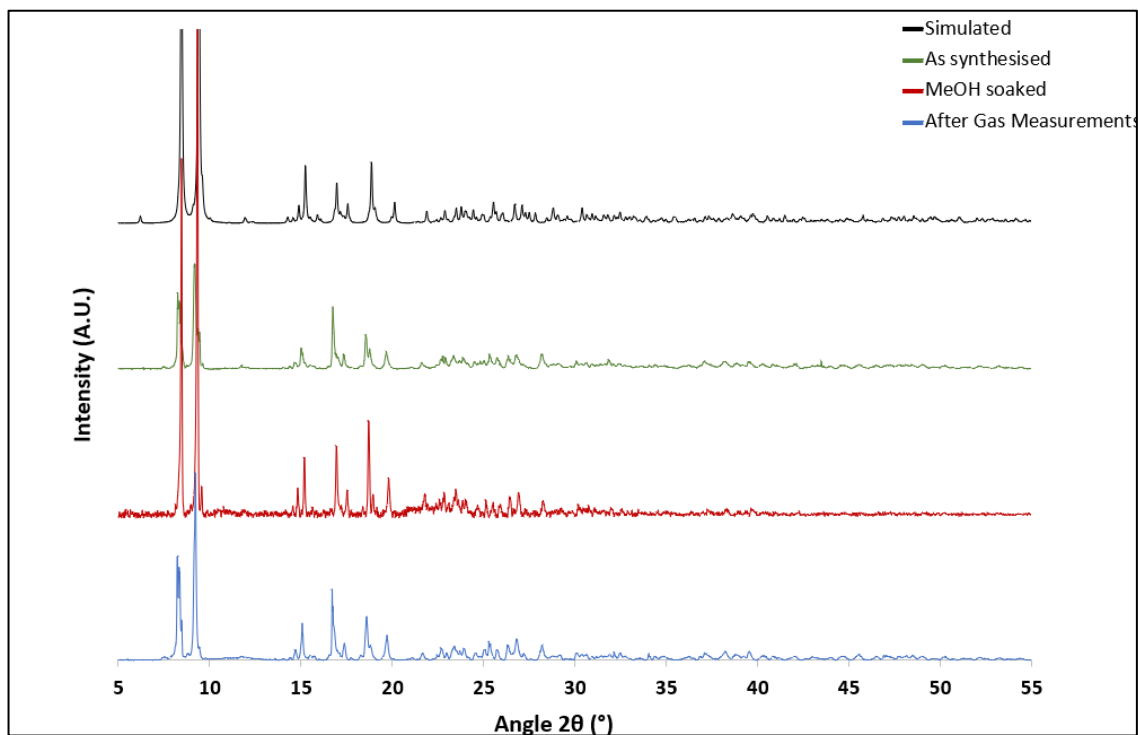

**Figure S7** X-ray powder diffraction data for complex **1** showing pattern simulated from single crystal data at 150K (black), measured as synthesised (green, room temperature), measured after soaking in methanol (red, room temperature/capillary) and measured after gas adsorption measurements (blue, room temperature)

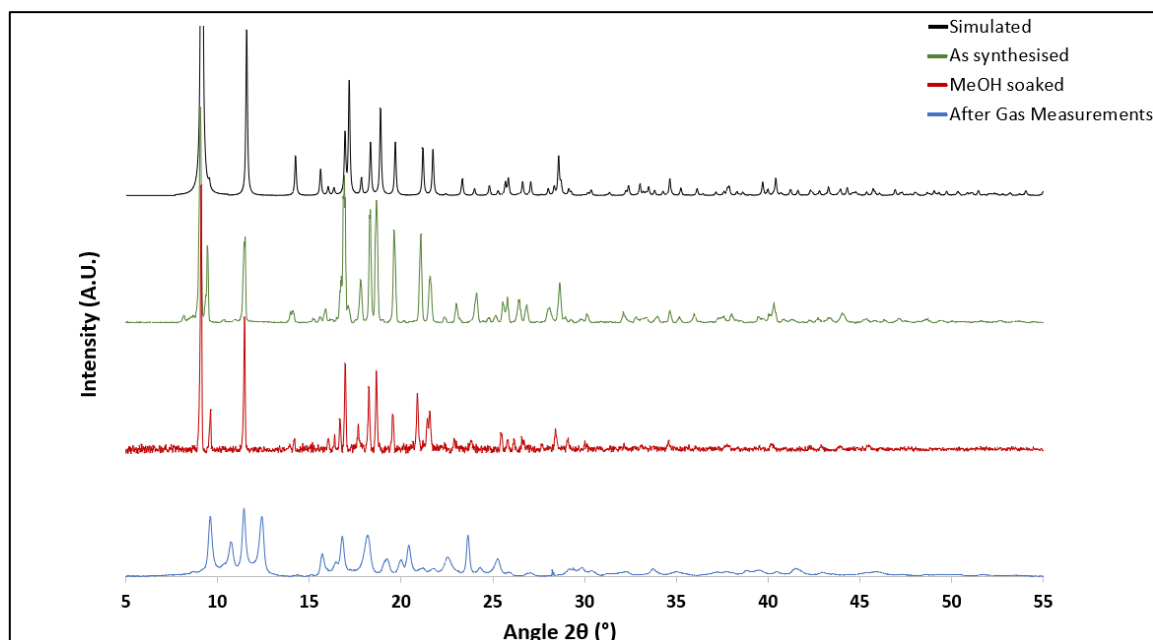

**Figure S8** X-ray powder diffraction data for complex **2** showing pattern simulated from single crystal data at 150K (black), measured as synthesised (green, room temperature), measured after soaking in methanol (red, room temperature/capillary) and measured after gas adsorption measurements (blue, room temperature)

#### 4. Thermogravimetric Analysis

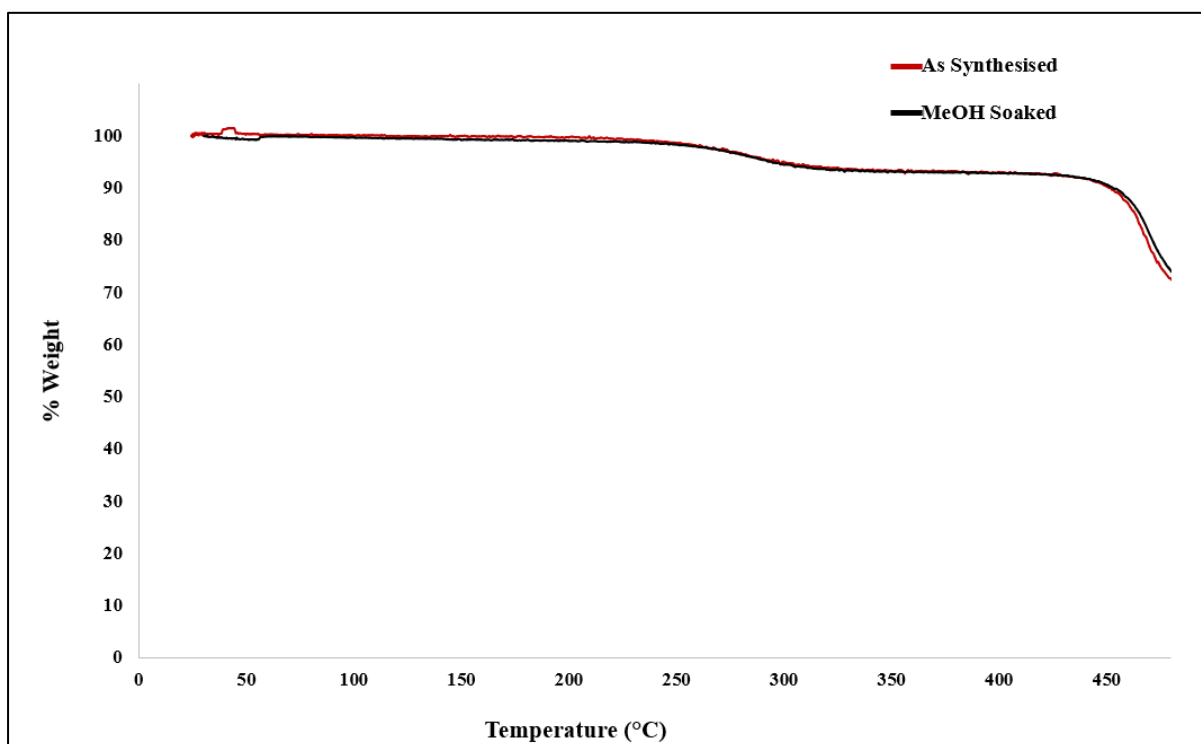

**Figure S9** Thermogravimetric analysis plots for complex **1**, as synthesised (red) and after soaking in MeOH (black)

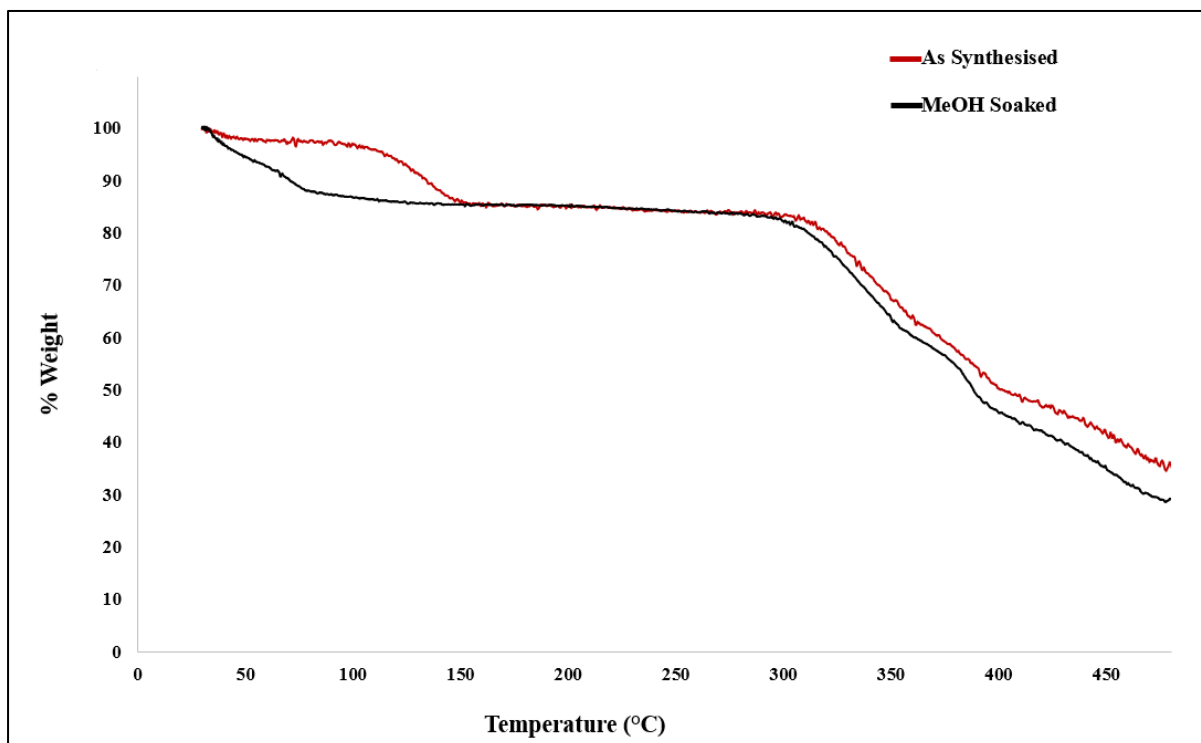

**Figure S10** Thermogravimetric Analysis for complex **2**, as synthesised (red) and after soaking in MeOH (black)

## 5. Gas Adsorption Data

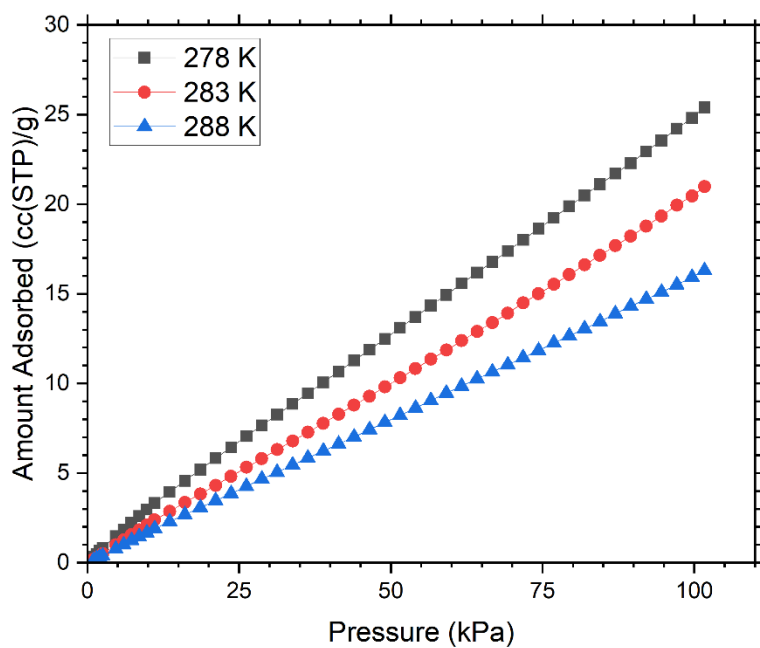

**Figure S11** CO<sub>2</sub> adsorption isotherms for compound **1** at 278, 283 and 288 K.

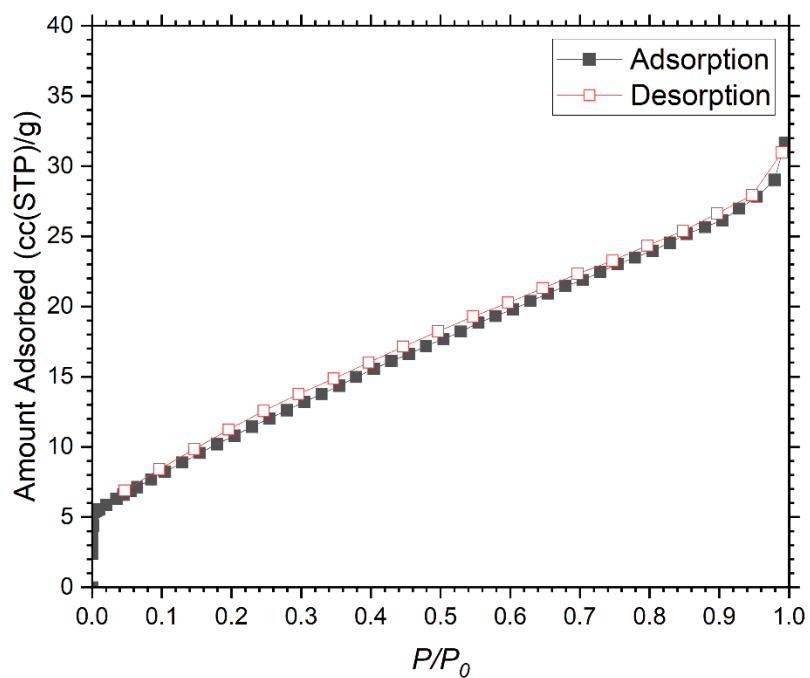

**Figure S12** N<sub>2</sub> adsorption (black, filled) and desorption (red, hollow) isotherms for compound **1** at 77 K.



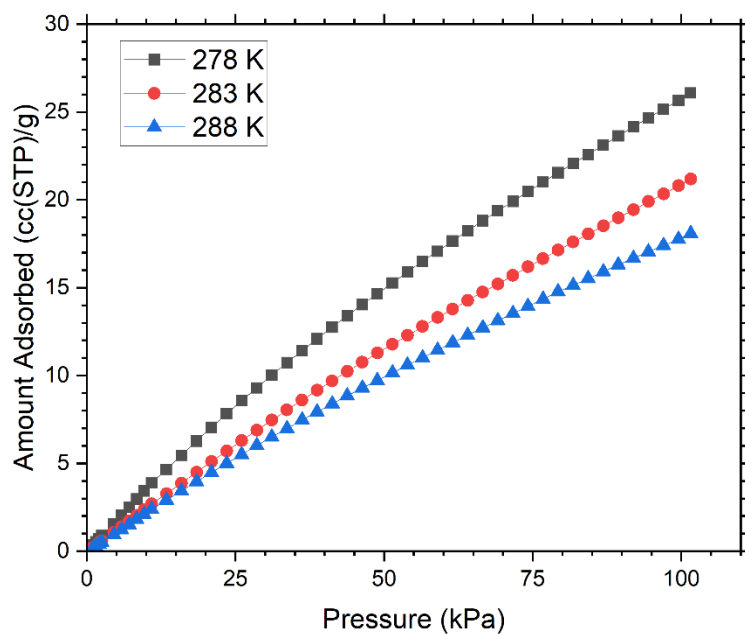

**Figure S13** CO<sub>2</sub> adsorption isotherms for compound **2** at 278, 283 and 288 K.

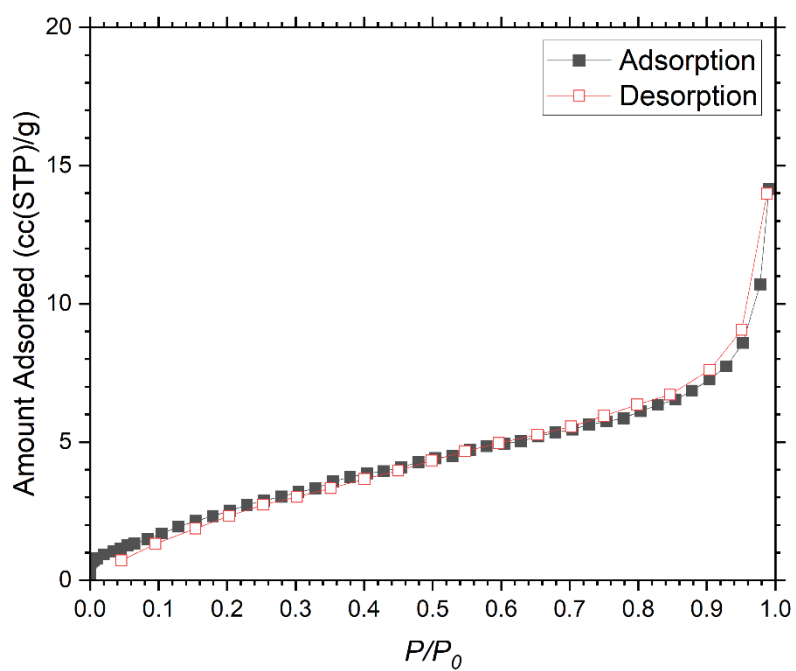

**Figure S14** N<sub>2</sub> adsorption (black, filled) and desorption (red, hollow) isotherms for compound **2** at 77 K.

## Enthalpy of Adsorption Calculations

The isosteric heat of adsorption for CO<sub>2</sub> in complexes **1** and **2** was estimated using a least-squares fitting routine of a virial thermal adsorption equation modelling  $\ln(P)$  as a function of gas loading.<sup>S1</sup> The model takes the form  $\ln(P) = \{\ln(N) + (a_0 + a_1N + a_2N^2 \dots)/T + b\}$ , where  $N$  represents the surface excess adsorption (mmol) at temperature  $T$  and  $a_0$ ,  $a_1$  and  $a_2$  are coefficients determined through least-squares fitting. The original parameter set of 5 parameters was sequentially reduced to maximise the data:parameter ratio. The enthalpy of adsorption is then given by the relation  $Q(N) = -R(a_0 + a_1N + a_2N^2 \dots)$ . Optimised coefficients and parameters are given below.

| Compound          | <b>1</b>      | <b>2</b>      |
|-------------------|---------------|---------------|
| Temperatures (K)  | 278, 283, 288 | 278, 283, 288 |
| $a_0$             | -4325.95      | -3847.37      |
| $a_1$             | 29.90523      | 57.80537      |
| $B$               | 19.9345       | 18.04117      |
| $R^2$             | 0.9980        | 0.9974        |
| Datapoints fitted | 138           | 138           |

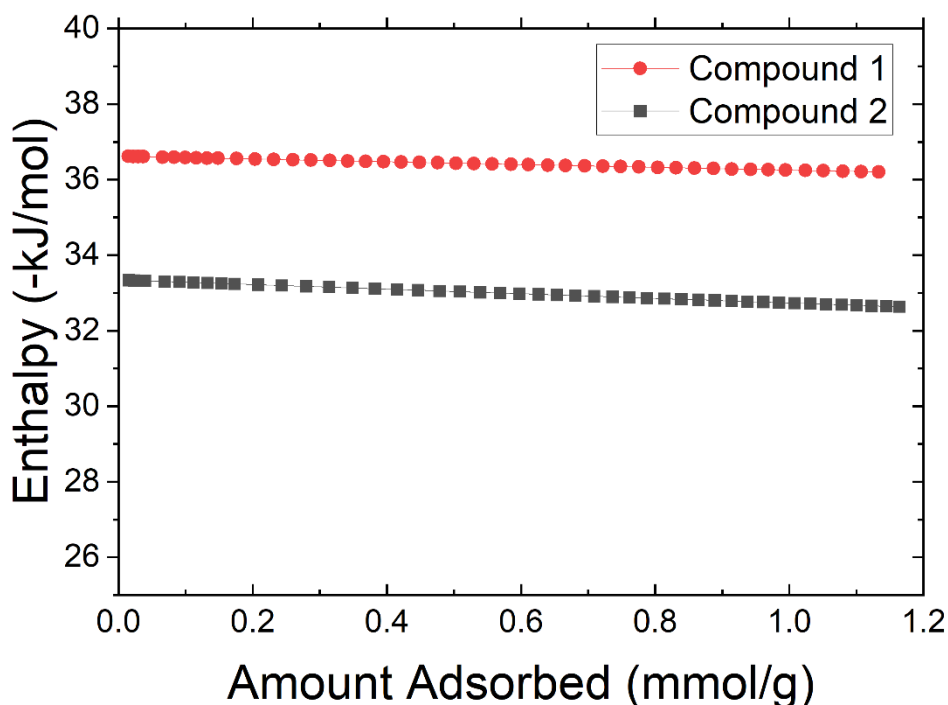

**Figure S15** Estimated CO<sub>2</sub> adsorption enthalpy as a function of gas loading for compounds **1** and **2**.

## 6. NMR Spectra

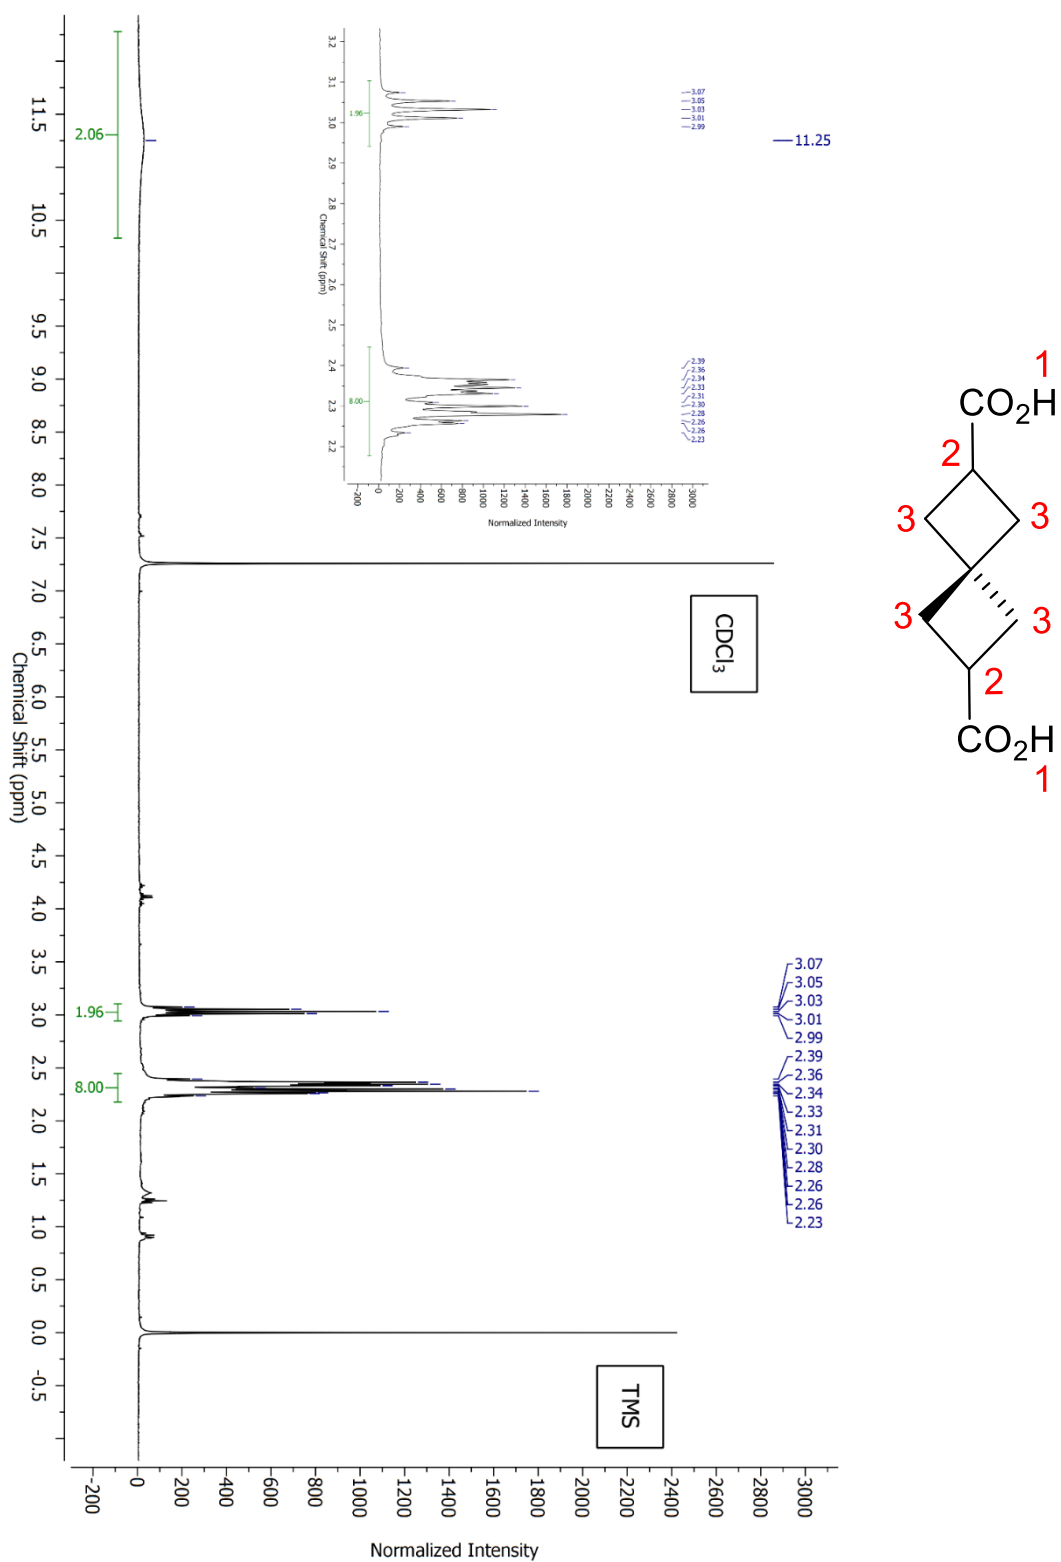

**Figure S16.**  $^1\text{H}$  NMR spectrum for  $\text{H}_2\text{SHDC}$  with proton numbering scheme

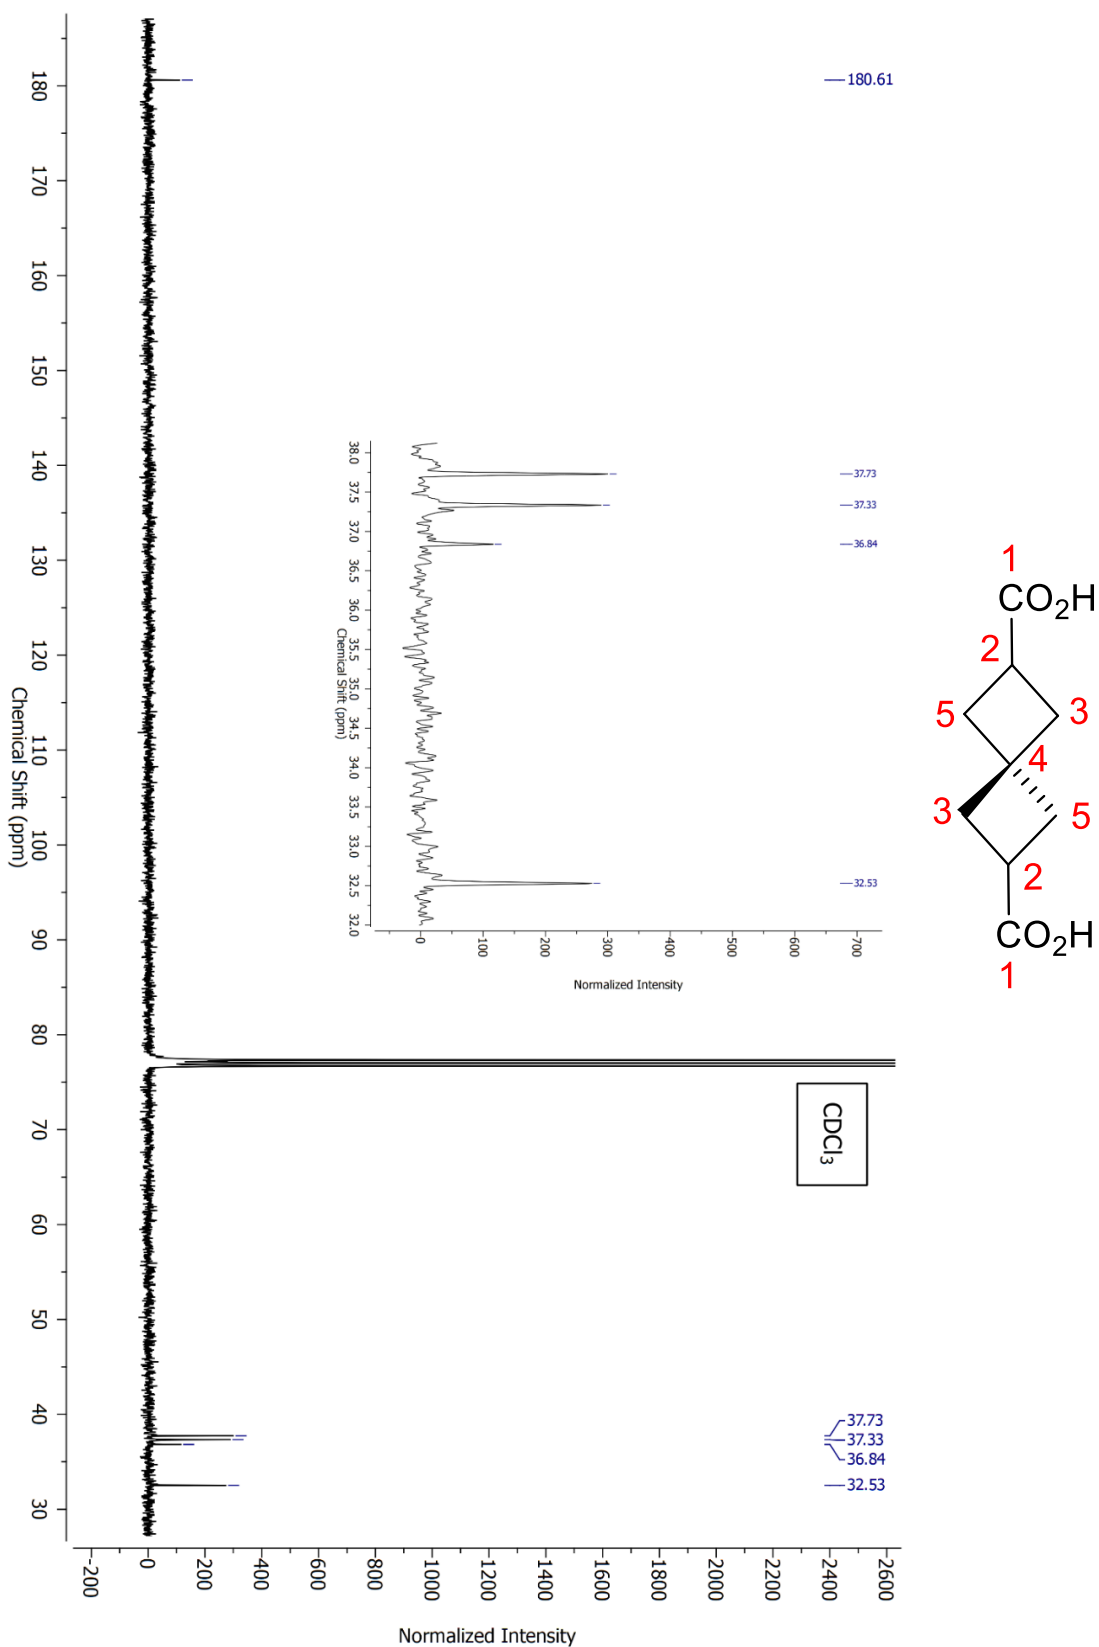

**Figure S17**  $^{13}\text{C}$  NMR Spectrum for  $\text{H}_2\text{SHDC}$  with carbon numbering scheme

## 7. References

S1. L. Czepirski and J. Jagiello, *Chem. Eng. Sci.* 1989, **44**, 797-801; S. Tedds, A. Walton, D. P. Broom and D. Book, *Faraday Discuss.* 2011, **151**, 75-94
